# Supplementary material for: Gene expression profiling of circulating tumor cells captured by MicroCavity Array is superior to enumeration in demonstrating therapy response in patients with newly diagnosed advanced and locally advanced non-small cell lung cancer
Source: PubMed Central journal article supplement — Transl Lung Cancer Res. 2023 Jan 16;12(1):109–26. doi: 10.21037/tlcr-22-314 (PMC9903084; doi:10.21037/tlcr-22-314), 2023-01-16
Supplement: tlcr-12-01-109-coif.pdf [file tlcr-12-01-109-coif.pdf]

## ICMJE DISCLOSURE FORM

Date: 6/15/2022

Your Name: Evan N Cohen

Manuscript Title: Gene expression profiling of circulating tumor cells captured by MicroCavity Array is superior to enumeration in demonstrating therapy response in patients with newly diagnosed advanced and locally advanced Non-Small Cell Lung Cancer

Manuscript number (if known): TLCR-22-314

In the interest of transparency, we ask you to disclose all relationships/activities/interests listed below that are related to the content of your manuscript. "Related" means any relation with for-profit or not-for-profit third parties whose interests may be affected by the content of the manuscript. Disclosure represents a commitment to transparency and does not necessarily indicate a bias. If you are in doubt about whether to list a relationship/activity/interest, it is preferable that you do so.

The following questions apply to the author's relationships/activities/interests as they relate to the current manuscript only.

The author's relationships/activities/interests should be defined broadly. For example, if your manuscript pertains to the epidemiology of hypertension, you should declare all relationships with manufacturers of antihypertensive medication, even if that medication is not mentioned in the manuscript.

In item #1 below, report all support for the work reported in this manuscript without time limit. For all other items, the time frame for disclosure is the past 36 months.

|                                                           |                                                                                                                                                                                | Name all entities with whom you have this relationship or indicate none (add rows as needed) | Specifications/Comments (e.g., if payments were made to you or to your institution)                                                                                                                                                                    |
|-----------------------------------------------------------|--------------------------------------------------------------------------------------------------------------------------------------------------------------------------------|----------------------------------------------------------------------------------------------|--------------------------------------------------------------------------------------------------------------------------------------------------------------------------------------------------------------------------------------------------------|
| <b>Time frame: Since the initial planning of the work</b> |                                                                                                                                                                                |                                                                                              |                                                                                                                                                                                                                                                        |
| 1                                                         | All support for the present manuscript (e.g., funding, provision of study materials, medical writing, article processing charges, etc.)<br><b>No time limit for this item.</b> | Hitachi Chemical Company of Tokyo, Japan                                                     | Hitachi Chemical Company of Tokyo Japan and The University of Texas MD Anderson Cancer Center entered into a Strategic Alliance Agreement to develop the MCA instrument and conduct the clinical trial that produced data reported in this manuscript. |
|                                                           |                                                                                                                                                                                |                                                                                              |                                                                                                                                                                                                                                                        |
|                                                           |                                                                                                                                                                                |                                                                                              |                                                                                                                                                                                                                                                        |
| <b>Time frame: past 36 months</b>                         |                                                                                                                                                                                |                                                                                              |                                                                                                                                                                                                                                                        |
| 2                                                         | Grants or contracts from any entity (if not indicated in item #1 above).                                                                                                       | X None                                                                                       |                                                                                                                                                                                                                                                        |
|                                                           |                                                                                                                                                                                |                                                                                              |                                                                                                                                                                                                                                                        |
| 3                                                         | Royalties or licenses                                                                                                                                                          | X None                                                                                       |                                                                                                                                                                                                                                                        |
|                                                           |                                                                                                                                                                                |                                                                                              |                                                                                                                                                                                                                                                        |
| 4                                                         | Consulting fees                                                                                                                                                                | X None                                                                                       |                                                                                                                                                                                                                                                        |

|    |                                                                                                              |        |  |
|----|--------------------------------------------------------------------------------------------------------------|--------|--|
|    |                                                                                                              |        |  |
| 5  | Payment or honoraria for lectures, presentations, speakers bureaus, manuscript writing or educational events | X None |  |
| 6  | Payment for expert testimony                                                                                 | X None |  |
| 7  | Support for attending meetings and/or travel                                                                 | X None |  |
| 8  | Patents planned, issued or pending                                                                           | X None |  |
| 9  | Participation on a Data Safety Monitoring Board or Advisory Board                                            | X None |  |
| 10 | Leadership or fiduciary role in other board, society, committee or advocacy group, paid or unpaid            | X None |  |
| 11 | Stock or stock options                                                                                       | X None |  |
| 12 | Receipt of equipment, materials, drugs, medical writing, gifts or other services                             | X None |  |
| 13 | Other financial or non-financial interests                                                                   | X None |  |

**Please summarize the above conflict of interest in the following box:**

Hitachi Chemical Company of Tokyo Japan and The University of Texas MD Anderson Cancer Center entered into a Strategic Alliance Agreement to develop the MCA instrument and conduct the clinical trial that produced data reported in this manuscript.

**Please place an "X" next to the following statement to indicate your agreement:**

  x   I certify that I have answered every question and have not altered the wording of any of the questions on this form.

## ICMJE DISCLOSURE FORM

Date: 6/15/2022

Your Name: Gitanjali Jayachandran

Manuscript Title: Gene expression profiling of circulating tumor cells captured by MicroCavity Array is superior to enumeration in demonstrating therapy response in patients with newly diagnosed advanced and locally advanced Non-Small Cell Lung Cancer

Manuscript number (if known): TLCR-22-314

In the interest of transparency, we ask you to disclose all relationships/activities/interests listed below that are related to the content of your manuscript. "Related" means any relation with for-profit or not-for-profit third parties whose interests may be affected by the content of the manuscript. Disclosure represents a commitment to transparency and does not necessarily indicate a bias. If you are in doubt about whether to list a relationship/activity/interest, it is preferable that you do so.

The following questions apply to the author's relationships/activities/interests as they relate to the current manuscript only.

The author's relationships/activities/interests should be defined broadly. For example, if your manuscript pertains to the epidemiology of hypertension, you should declare all relationships with manufacturers of antihypertensive medication, even if that medication is not mentioned in the manuscript.

In item #1 below, report all support for the work reported in this manuscript without time limit. For all other items, the time frame for disclosure is the past 36 months.

|                                                           |                                                                                                                                                                                | Name all entities with whom you have this relationship or indicate none (add rows as needed) | Specifications/Comments (e.g., if payments were made to you or to your institution)                                                                                                                                                                    |
|-----------------------------------------------------------|--------------------------------------------------------------------------------------------------------------------------------------------------------------------------------|----------------------------------------------------------------------------------------------|--------------------------------------------------------------------------------------------------------------------------------------------------------------------------------------------------------------------------------------------------------|
| <b>Time frame: Since the initial planning of the work</b> |                                                                                                                                                                                |                                                                                              |                                                                                                                                                                                                                                                        |
| 1                                                         | All support for the present manuscript (e.g., funding, provision of study materials, medical writing, article processing charges, etc.)<br><b>No time limit for this item.</b> | Hitachi Chemical Company of Tokyo, Japan                                                     | Hitachi Chemical Company of Tokyo Japan and The University of Texas MD Anderson Cancer Center entered into a Strategic Alliance Agreement to develop the MCA instrument and conduct the clinical trial that produced data reported in this manuscript. |
|                                                           |                                                                                                                                                                                |                                                                                              |                                                                                                                                                                                                                                                        |
|                                                           |                                                                                                                                                                                |                                                                                              |                                                                                                                                                                                                                                                        |
| <b>Time frame: past 36 months</b>                         |                                                                                                                                                                                |                                                                                              |                                                                                                                                                                                                                                                        |
| 2                                                         | Grants or contracts from any entity (if not indicated in item #1 above).                                                                                                       | None                                                                                         |                                                                                                                                                                                                                                                        |
|                                                           |                                                                                                                                                                                |                                                                                              |                                                                                                                                                                                                                                                        |
| 3                                                         | Royalties or licenses                                                                                                                                                          | None                                                                                         |                                                                                                                                                                                                                                                        |
|                                                           |                                                                                                                                                                                |                                                                                              |                                                                                                                                                                                                                                                        |
|                                                           |                                                                                                                                                                                |                                                                                              |                                                                                                                                                                                                                                                        |

|    |                                                                                                              |      |  |
|----|--------------------------------------------------------------------------------------------------------------|------|--|
| 4  | Consulting fees                                                                                              | None |  |
| 5  | Payment or honoraria for lectures, presentations, speakers bureaus, manuscript writing or educational events | None |  |
| 6  | Payment for expert testimony                                                                                 | None |  |
| 7  | Support for attending meetings and/or travel                                                                 | None |  |
| 8  | Patents planned, issued or pending                                                                           | None |  |
| 9  | Participation on a Data Safety Monitoring Board or Advisory Board                                            | None |  |
| 10 | Leadership or fiduciary role in other board, society, committee or advocacy group, paid or unpaid            | None |  |
| 11 | Stock or stock options                                                                                       | None |  |
| 12 | Receipt of equipment, materials, drugs, medical writing, gifts or other services                             | None |  |
| 13 | Other financial or non-financial interests                                                                   | None |  |

**Please summarize the above conflict of interest in the following box:**

Hitachi Chemical Company of Tokyo Japan and The University of Texas MD Anderson Cancer Center entered into a Strategic Alliance Agreement to develop the MCA instrument and conduct the clinical trial that produced data reported in this manuscript.

**Please place an "X" next to the following statement to indicate your agreement:**

I certify that I have answered every question and have not altered the wording of any of the questions on this form.

## ICMJE DISCLOSURE FORM

Date: 6/15/2022

Your Name: Hui Gao

Manuscript Title: Gene expression profiling of circulating tumor cells captured by MicroCavity Array is superior to enumeration in demonstrating therapy response in patients with newly diagnosed advanced and locally advanced Non-Small Cell Lung Cancer

Manuscript number (if known): TLCR-22-314

In the interest of transparency, we ask you to disclose all relationships/activities/interests listed below that are related to the content of your manuscript. "Related" means any relation with for-profit or not-for-profit third parties whose interests may be affected by the content of the manuscript. Disclosure represents a commitment to transparency and does not necessarily indicate a bias. If you are in doubt about whether to list a relationship/activity/interest, it is preferable that you do so.

The following questions apply to the author's relationships/activities/interests as they relate to the **current manuscript only**.

The author's relationships/activities/interests should be **defined broadly**. For example, if your manuscript pertains to the epidemiology of hypertension, you should declare all relationships with manufacturers of antihypertensive medication, even if that medication is not mentioned in the manuscript.

In item #1 below, report all support for the work reported in this manuscript without time limit. For all other items, the time frame for disclosure is the past 36 months.

|                                                           |                                                                                                                                                                                | Name all entities with whom you have this relationship or indicate none (add rows as needed) | Specifications/Comments (e.g., if payments were made to you or to your institution)                                                                                                                                                                    |
|-----------------------------------------------------------|--------------------------------------------------------------------------------------------------------------------------------------------------------------------------------|----------------------------------------------------------------------------------------------|--------------------------------------------------------------------------------------------------------------------------------------------------------------------------------------------------------------------------------------------------------|
| <b>Time frame: Since the initial planning of the work</b> |                                                                                                                                                                                |                                                                                              |                                                                                                                                                                                                                                                        |
| 1                                                         | All support for the present manuscript (e.g., funding, provision of study materials, medical writing, article processing charges, etc.)<br><b>No time limit for this item.</b> | Hitachi Chemical Company of Tokyo, Japan                                                     | Hitachi Chemical Company of Tokyo Japan and The University of Texas MD Anderson Cancer Center entered into a Strategic Alliance Agreement to develop the MCA instrument and conduct the clinical trial that produced data reported in this manuscript. |
|                                                           |                                                                                                                                                                                |                                                                                              |                                                                                                                                                                                                                                                        |
|                                                           |                                                                                                                                                                                |                                                                                              |                                                                                                                                                                                                                                                        |
| <b>Time frame: past 36 months</b>                         |                                                                                                                                                                                |                                                                                              |                                                                                                                                                                                                                                                        |
| 2                                                         | Grants or contracts from any entity (if not indicated in item #1 above).                                                                                                       | None                                                                                         |                                                                                                                                                                                                                                                        |
|                                                           |                                                                                                                                                                                |                                                                                              |                                                                                                                                                                                                                                                        |
| 3                                                         | Royalties or licenses                                                                                                                                                          | None                                                                                         |                                                                                                                                                                                                                                                        |
|                                                           |                                                                                                                                                                                |                                                                                              |                                                                                                                                                                                                                                                        |
|                                                           |                                                                                                                                                                                |                                                                                              |                                                                                                                                                                                                                                                        |

|    |                                                                                                              |      |  |
|----|--------------------------------------------------------------------------------------------------------------|------|--|
| 4  | Consulting fees                                                                                              | None |  |
|    |                                                                                                              |      |  |
|    |                                                                                                              |      |  |
| 5  | Payment or honoraria for lectures, presentations, speakers bureaus, manuscript writing or educational events | None |  |
|    |                                                                                                              |      |  |
|    |                                                                                                              |      |  |
| 6  | Payment for expert testimony                                                                                 | None |  |
|    |                                                                                                              |      |  |
|    |                                                                                                              |      |  |
| 7  | Support for attending meetings and/or travel                                                                 | None |  |
|    |                                                                                                              |      |  |
|    |                                                                                                              |      |  |
| 8  | Patents planned, issued or pending                                                                           | None |  |
|    |                                                                                                              |      |  |
|    |                                                                                                              |      |  |
| 9  | Participation on a Data Safety Monitoring Board or Advisory Board                                            | None |  |
|    |                                                                                                              |      |  |
|    |                                                                                                              |      |  |
| 10 | Leadership or fiduciary role in other board, society, committee or advocacy group, paid or unpaid            | None |  |
|    |                                                                                                              |      |  |
|    |                                                                                                              |      |  |
| 11 | Stock or stock options                                                                                       | None |  |
|    |                                                                                                              |      |  |
|    |                                                                                                              |      |  |
| 12 | Receipt of equipment, materials, drugs, medical writing, gifts or other services                             | None |  |
|    |                                                                                                              |      |  |
|    |                                                                                                              |      |  |
| 13 | Other financial or non-financial interests                                                                   | None |  |
|    |                                                                                                              |      |  |
|    |                                                                                                              |      |  |

**Please summarize the above conflict of interest in the following box:**

Hitachi Chemical Company of Tokyo Japan and The University of Texas MD Anderson Cancer Center entered into a Strategic Alliance Agreement to develop the MCA instrument and conduct the clinical trial that produced data reported in this manuscript.

**Please place an "X" next to the following statement to indicate your agreement:**

I certify that I have answered every question and have not altered the wording of any of the questions on this form.

## ICMJE DISCLOSURE FORM

Date: 6/15/2022

Your Name: Phillip Peabody

Manuscript Title: Gene expression profiling of circulating tumor cells captured by MicroCavity Array is superior to enumeration in demonstrating therapy response in patients with newly diagnosed advanced and locally advanced Non-Small Cell Lung Cancer

Manuscript number (if known): TLCR-22-314

In the interest of transparency, we ask you to disclose all relationships/activities/interests listed below that are related to the content of your manuscript. "Related" means any relation with for-profit or not-for-profit third parties whose interests may be affected by the content of the manuscript. Disclosure represents a commitment to transparency and does not necessarily indicate a bias. If you are in doubt about whether to list a relationship/activity/interest, it is preferable that you do so.

The following questions apply to the author's relationships/activities/interests as they relate to the current manuscript only.

The author's relationships/activities/interests should be defined broadly. For example, if your manuscript pertains to the epidemiology of hypertension, you should declare all relationships with manufacturers of antihypertensive medication, even if that medication is not mentioned in the manuscript.

In item #1 below, report all support for the work reported in this manuscript without time limit. For all other items, the time frame for disclosure is the past 36 months.

|                                                           |                                                                                                                                                                                | Name all entities with whom you have this relationship or indicate none (add rows as needed) | Specifications/Comments (e.g., if payments were made to you or to your institution)                                                                                                                                                                    |
|-----------------------------------------------------------|--------------------------------------------------------------------------------------------------------------------------------------------------------------------------------|----------------------------------------------------------------------------------------------|--------------------------------------------------------------------------------------------------------------------------------------------------------------------------------------------------------------------------------------------------------|
| <b>Time frame: Since the initial planning of the work</b> |                                                                                                                                                                                |                                                                                              |                                                                                                                                                                                                                                                        |
| 1                                                         | All support for the present manuscript (e.g., funding, provision of study materials, medical writing, article processing charges, etc.)<br><b>No time limit for this item.</b> | Hitachi Chemical Company of Tokyo, Japan                                                     | Hitachi Chemical Company of Tokyo Japan and The University of Texas MD Anderson Cancer Center entered into a Strategic Alliance Agreement to develop the MCA instrument and conduct the clinical trial that produced data reported in this manuscript. |
|                                                           |                                                                                                                                                                                |                                                                                              |                                                                                                                                                                                                                                                        |
|                                                           |                                                                                                                                                                                |                                                                                              |                                                                                                                                                                                                                                                        |
|                                                           |                                                                                                                                                                                |                                                                                              |                                                                                                                                                                                                                                                        |
| <b>Time frame: past 36 months</b>                         |                                                                                                                                                                                |                                                                                              |                                                                                                                                                                                                                                                        |
| 2                                                         | Grants or contracts from any entity (if not indicated in item #1 above).                                                                                                       | None                                                                                         |                                                                                                                                                                                                                                                        |
|                                                           |                                                                                                                                                                                |                                                                                              |                                                                                                                                                                                                                                                        |
| 3                                                         | Royalties or licenses                                                                                                                                                          | None                                                                                         |                                                                                                                                                                                                                                                        |
|                                                           |                                                                                                                                                                                |                                                                                              |                                                                                                                                                                                                                                                        |

|    |                                                                                                              |      |  |
|----|--------------------------------------------------------------------------------------------------------------|------|--|
| 4  | Consulting fees                                                                                              | None |  |
| 5  | Payment or honoraria for lectures, presentations, speakers bureaus, manuscript writing or educational events | None |  |
| 6  | Payment for expert testimony                                                                                 | None |  |
| 7  | Support for attending meetings and/or travel                                                                 | None |  |
| 8  | Patents planned, issued or pending                                                                           | None |  |
| 9  | Participation on a Data Safety Monitoring Board or Advisory Board                                            | None |  |
| 10 | Leadership or fiduciary role in other board, society, committee or advocacy group, paid or unpaid            | None |  |
| 11 | Stock or stock options                                                                                       | None |  |
| 12 | Receipt of equipment, materials, drugs, medical writing, gifts or other services                             | None |  |
| 13 | Other financial or non-financial interests                                                                   | None |  |

**Please summarize the above conflict of interest in the following box:**

Hitachi Chemical Company of Tokyo Japan and The University of Texas MD Anderson Cancer Center entered into a Strategic Alliance Agreement to develop the MCA instrument and conduct the clinical trial that produced data reported in this manuscript.

**Please place an "X" next to the following statement to indicate your agreement:**

I certify that I have answered every question and have not altered the wording of any of the questions on this form.



## ICMJE DISCLOSURE FORM

Date: 6/15/2022

Your Name: Heather B, McBride

Manuscript Title: Gene expression profiling of circulating tumor cells captured by MicroCavity Array is superior to enumeration in demonstrating therapy response in patients with newly diagnosed advanced and locally advanced Non-Small Cell Lung Cancer

Manuscript number (if known): TLCR-22-314

In the interest of transparency, we ask you to disclose all relationships/activities/interests listed below that are related to the content of your manuscript. "Related" means any relation with for-profit or not-for-profit third parties whose interests may be affected by the content of the manuscript. Disclosure represents a commitment to transparency and does not necessarily indicate a bias. If you are in doubt about whether to list a relationship/activity/interest, it is preferable that you do so.

The following questions apply to the author's relationships/activities/interests as they relate to the current manuscript only.

The author's relationships/activities/interests should be defined broadly. For example, if your manuscript pertains to the epidemiology of hypertension, you should declare all relationships with manufacturers of antihypertensive medication, even if that medication is not mentioned in the manuscript.

In item #1 below, report all support for the work reported in this manuscript without time limit. For all other items, the time frame for disclosure is the past 36 months.

|                                                           |                                                                                                                                                                                | Name all entities with whom you have this relationship or indicate none (add rows as needed) | Specifications/Comments (e.g., if payments were made to you or to your institution)                                                                                                                                                                    |
|-----------------------------------------------------------|--------------------------------------------------------------------------------------------------------------------------------------------------------------------------------|----------------------------------------------------------------------------------------------|--------------------------------------------------------------------------------------------------------------------------------------------------------------------------------------------------------------------------------------------------------|
| <b>Time frame: Since the initial planning of the work</b> |                                                                                                                                                                                |                                                                                              |                                                                                                                                                                                                                                                        |
| 1                                                         | All support for the present manuscript (e.g., funding, provision of study materials, medical writing, article processing charges, etc.)<br><b>No time limit for this item.</b> | Hitachi Chemical Company of Tokyo, Japan                                                     | Hitachi Chemical Company of Tokyo Japan and The University of Texas MD Anderson Cancer Center entered into a Strategic Alliance Agreement to develop the MCA instrument and conduct the clinical trial that produced data reported in this manuscript. |
|                                                           |                                                                                                                                                                                |                                                                                              |                                                                                                                                                                                                                                                        |
|                                                           |                                                                                                                                                                                |                                                                                              |                                                                                                                                                                                                                                                        |
| <b>Time frame: past 36 months</b>                         |                                                                                                                                                                                |                                                                                              |                                                                                                                                                                                                                                                        |
| 2                                                         | Grants or contracts from any entity (if not indicated in item #1 above).                                                                                                       | None                                                                                         |                                                                                                                                                                                                                                                        |
|                                                           |                                                                                                                                                                                |                                                                                              |                                                                                                                                                                                                                                                        |
| 3                                                         | Royalties or licenses                                                                                                                                                          | None                                                                                         |                                                                                                                                                                                                                                                        |
|                                                           |                                                                                                                                                                                |                                                                                              |                                                                                                                                                                                                                                                        |
| 4                                                         | Consulting fees                                                                                                                                                                | None                                                                                         |                                                                                                                                                                                                                                                        |

|    |                                                                                                              |      |  |
|----|--------------------------------------------------------------------------------------------------------------|------|--|
|    |                                                                                                              |      |  |
| 5  | Payment or honoraria for lectures, presentations, speakers bureaus, manuscript writing or educational events | None |  |
| 6  | Payment for expert testimony                                                                                 | None |  |
| 7  | Support for attending meetings and/or travel                                                                 | None |  |
| 8  | Patents planned, issued or pending                                                                           | None |  |
| 9  | Participation on a Data Safety Monitoring Board or Advisory Board                                            | None |  |
| 10 | Leadership or fiduciary role in other board, society, committee or advocacy group, paid or unpaid            | None |  |
| 11 | Stock or stock options                                                                                       | None |  |
| 12 | Receipt of equipment, materials, drugs, medical writing, gifts or other services                             | None |  |
| 13 | Other financial or non-financial interests                                                                   | None |  |

**Please summarize the above conflict of interest in the following box:**

Hitachi Chemical Company of Tokyo Japan and The University of Texas MD Anderson Cancer Center entered into a Strategic Alliance Agreement to develop the MCA instrument and conduct the clinical trial that produced data reported in this manuscript.

**Please place an "X" next to the following statement to indicate your agreement:**

I certify that I have answered every question and have not altered the wording of any of the questions on this form.

## ICMJE DISCLOSURE FORM

Date: 6/15/2022

Your Name: Franklin David Alvarez

Manuscript Title: Gene expression profiling of circulating tumor cells captured by MicroCavity Array is superior to enumeration in demonstrating therapy response in patients with newly diagnosed advanced and locally advanced Non-Small Cell Lung Cancer

Manuscript number (if known): TLCR-22-314

In the interest of transparency, we ask you to disclose all relationships/activities/interests listed below that are related to the content of your manuscript. "Related" means any relation with for-profit or not-for-profit third parties whose interests may be affected by the content of the manuscript. Disclosure represents a commitment to transparency and does not necessarily indicate a bias. If you are in doubt about whether to list a relationship/activity/interest, it is preferable that you do so.

The following questions apply to the author's relationships/activities/interests as they relate to the current manuscript only.

The author's relationships/activities/interests should be defined broadly. For example, if your manuscript pertains to the epidemiology of hypertension, you should declare all relationships with manufacturers of antihypertensive medication, even if that medication is not mentioned in the manuscript.

In item #1 below, report all support for the work reported in this manuscript without time limit. For all other items, the time frame for disclosure is the past 36 months.

|                                                           |                                                                                                                                                                                | Name all entities with whom you have this relationship or indicate none (add rows as needed) | Specifications/Comments (e.g., if payments were made to you or to your institution)                                                                                                                                                                    |
|-----------------------------------------------------------|--------------------------------------------------------------------------------------------------------------------------------------------------------------------------------|----------------------------------------------------------------------------------------------|--------------------------------------------------------------------------------------------------------------------------------------------------------------------------------------------------------------------------------------------------------|
| <b>Time frame: Since the initial planning of the work</b> |                                                                                                                                                                                |                                                                                              |                                                                                                                                                                                                                                                        |
| 1                                                         | All support for the present manuscript (e.g., funding, provision of study materials, medical writing, article processing charges, etc.)<br><b>No time limit for this item.</b> | Hitachi Chemical Company of Tokyo, Japan                                                     | Hitachi Chemical Company of Tokyo Japan and The University of Texas MD Anderson Cancer Center entered into a Strategic Alliance Agreement to develop the MCA instrument and conduct the clinical trial that produced data reported in this manuscript. |
|                                                           |                                                                                                                                                                                |                                                                                              |                                                                                                                                                                                                                                                        |
|                                                           |                                                                                                                                                                                |                                                                                              |                                                                                                                                                                                                                                                        |
| <b>Time frame: past 36 months</b>                         |                                                                                                                                                                                |                                                                                              |                                                                                                                                                                                                                                                        |
| 2                                                         | Grants or contracts from any entity (if not indicated in item #1 above).                                                                                                       | None                                                                                         |                                                                                                                                                                                                                                                        |
|                                                           |                                                                                                                                                                                |                                                                                              |                                                                                                                                                                                                                                                        |
| 3                                                         | Royalties or licenses                                                                                                                                                          | None                                                                                         |                                                                                                                                                                                                                                                        |
|                                                           |                                                                                                                                                                                |                                                                                              |                                                                                                                                                                                                                                                        |
|                                                           |                                                                                                                                                                                |                                                                                              |                                                                                                                                                                                                                                                        |

|    |                                                                                                              |      |  |
|----|--------------------------------------------------------------------------------------------------------------|------|--|
| 4  | Consulting fees                                                                                              | None |  |
|    |                                                                                                              |      |  |
|    |                                                                                                              |      |  |
| 5  | Payment or honoraria for lectures, presentations, speakers bureaus, manuscript writing or educational events | None |  |
|    |                                                                                                              |      |  |
|    |                                                                                                              |      |  |
| 6  | Payment for expert testimony                                                                                 | None |  |
|    |                                                                                                              |      |  |
|    |                                                                                                              |      |  |
| 7  | Support for attending meetings and/or travel                                                                 | None |  |
|    |                                                                                                              |      |  |
|    |                                                                                                              |      |  |
| 8  | Patents planned, issued or pending                                                                           | None |  |
|    |                                                                                                              |      |  |
|    |                                                                                                              |      |  |
| 9  | Participation on a Data Safety Monitoring Board or Advisory Board                                            | None |  |
|    |                                                                                                              |      |  |
|    |                                                                                                              |      |  |
| 10 | Leadership or fiduciary role in other board, society, committee or advocacy group, paid or unpaid            | None |  |
|    |                                                                                                              |      |  |
|    |                                                                                                              |      |  |
| 11 | Stock or stock options                                                                                       | None |  |
|    |                                                                                                              |      |  |
|    |                                                                                                              |      |  |
| 12 | Receipt of equipment, materials, drugs, medical writing, gifts or other services                             | None |  |
|    |                                                                                                              |      |  |
|    |                                                                                                              |      |  |
| 13 | Other financial or non-financial interests                                                                   | None |  |
|    |                                                                                                              |      |  |
|    |                                                                                                              |      |  |

**Please summarize the above conflict of interest in the following box:**

Hitachi Chemical Company of Tokyo Japan and The University of Texas MD Anderson Cancer Center entered into a Strategic Alliance Agreement to develop the MCA instrument and conduct the clinical trial that produced data reported in this manuscript.

**Please place an "X" next to the following statement to indicate your agreement:**

I certify that I have answered every question and have not altered the wording of any of the questions on this form.

## ICMJE DISCLOSURE FORM

Date: 6/15/2022

Your Name: Pablo Lopez Bravo

Manuscript Title: Gene expression profiling of circulating tumor cells captured by MicroCavity Array is superior to enumeration in demonstrating therapy response in patients with newly diagnosed advanced and locally advanced Non-Small Cell Lung Cancer

Manuscript number (if known): TLCR-22-314-CL

In the interest of transparency, we ask you to disclose all relationships/activities/interests listed below that are related to the content of your manuscript. "Related" means any relation with for-profit or not-for-profit third parties whose interests may be affected by the content of the manuscript. Disclosure represents a commitment to transparency and does not necessarily indicate a bias. If you are in doubt about whether to list a relationship/activity/interest, it is preferable that you do so.

The following questions apply to the author's relationships/activities/interests as they relate to the current manuscript only.

The author's relationships/activities/interests should be defined broadly. For example, if your manuscript pertains to the epidemiology of hypertension, you should declare all relationships with manufacturers of antihypertensive medication, even if that medication is not mentioned in the manuscript.

In item #1 below, report all support for the work reported in this manuscript without time limit. For all other items, the time frame for disclosure is the past 36 months.

|                                   |                                                                                                                                                                                | Name all entities with whom you have this relationship or indicate none (add rows as needed) | Specifications/Comments (e.g., if payments were made to you or to your institution)                                                                                                                                                                    |
|-----------------------------------|--------------------------------------------------------------------------------------------------------------------------------------------------------------------------------|----------------------------------------------------------------------------------------------|--------------------------------------------------------------------------------------------------------------------------------------------------------------------------------------------------------------------------------------------------------|
|                                   |                                                                                                                                                                                |                                                                                              |                                                                                                                                                                                                                                                        |
| 1                                 | All support for the present manuscript (e.g., funding, provision of study materials, medical writing, article processing charges, etc.)<br><b>No time limit for this item.</b> | Hitachi Chemical Company of Tokyo, Japan                                                     | Hitachi Chemical Company of Tokyo Japan and The University of Texas MD Anderson Cancer Center entered into a Strategic Alliance Agreement to develop the MCA instrument and conduct the clinical trial that produced data reported in this manuscript. |
|                                   |                                                                                                                                                                                |                                                                                              |                                                                                                                                                                                                                                                        |
|                                   |                                                                                                                                                                                |                                                                                              |                                                                                                                                                                                                                                                        |
|                                   |                                                                                                                                                                                |                                                                                              |                                                                                                                                                                                                                                                        |
|                                   |                                                                                                                                                                                |                                                                                              |                                                                                                                                                                                                                                                        |
|                                   |                                                                                                                                                                                |                                                                                              |                                                                                                                                                                                                                                                        |
| <b>Time frame: past 36 months</b> |                                                                                                                                                                                |                                                                                              |                                                                                                                                                                                                                                                        |
| 2                                 | Grants or contracts from any entity (if not indicated in item #1 above).                                                                                                       | None                                                                                         |                                                                                                                                                                                                                                                        |
|                                   |                                                                                                                                                                                |                                                                                              |                                                                                                                                                                                                                                                        |
| 3                                 | Royalties or licenses                                                                                                                                                          | None                                                                                         |                                                                                                                                                                                                                                                        |

|    |                                                                                                              |      |  |
|----|--------------------------------------------------------------------------------------------------------------|------|--|
|    |                                                                                                              |      |  |
| 4  | Consulting fees                                                                                              | None |  |
| 5  | Payment or honoraria for lectures, presentations, speakers bureaus, manuscript writing or educational events | None |  |
| 6  | Payment for expert testimony                                                                                 | None |  |
| 7  | Support for attending meetings and/or travel                                                                 | None |  |
| 8  | Patents planned, issued or pending                                                                           | None |  |
| 9  | Participation on a Data Safety Monitoring Board or Advisory Board                                            | None |  |
| 10 | Leadership or fiduciary role in other board, society, committee or advocacy group, paid or unpaid            | None |  |
| 11 | Stock or stock options                                                                                       | None |  |
| 12 | Receipt of equipment, materials, drugs, medical writing, gifts or other services                             | None |  |
| 13 | Other financial or non-financial interests                                                                   | None |  |

**Please summarize the above conflict of interest in the following box:**

Hitachi Chemical Company of Tokyo Japan and The University of Texas MD Anderson Cancer Center entered into a Strategic Alliance Agreement to develop the MCA instrument and conduct the clinical trial that produced data reported in this manuscript.

**Please place an "X" next to the following statement to indicate your agreement:**

  x   I certify that I have answered every question and have not altered the wording of any of the questions on this form.

## ICMJE DISCLOSURE FORM

Date: 6/15/2022

Your Name: Wei Qiao

Manuscript Title: Gene expression profiling of circulating tumor cells captured by MicroCavity Array is superior to enumeration in demonstrating therapy response in patients with newly diagnosed advanced and locally advanced Non-Small Cell Lung Cancer

Manuscript number (if known): TLCR-22-314

In the interest of transparency, we ask you to disclose all relationships/activities/interests listed below that are related to the content of your manuscript. "Related" means any relation with for-profit or not-for-profit third parties whose interests may be affected by the content of the manuscript. Disclosure represents a commitment to transparency and does not necessarily indicate a bias. If you are in doubt about whether to list a relationship/activity/interest, it is preferable that you do so.

The following questions apply to the author's relationships/activities/interests as they relate to the current manuscript only.

The author's relationships/activities/interests should be defined broadly. For example, if your manuscript pertains to the epidemiology of hypertension, you should declare all relationships with manufacturers of antihypertensive medication, even if that medication is not mentioned in the manuscript.

In item #1 below, report all support for the work reported in this manuscript without time limit. For all other items, the time frame for disclosure is the past 36 months.

|                                                           |                                                                                                                                                                                | Name all entities with whom you have this relationship or indicate none (add rows as needed) | Specifications/Comments (e.g., if payments were made to you or to your institution)                                                                                                                                                                    |
|-----------------------------------------------------------|--------------------------------------------------------------------------------------------------------------------------------------------------------------------------------|----------------------------------------------------------------------------------------------|--------------------------------------------------------------------------------------------------------------------------------------------------------------------------------------------------------------------------------------------------------|
| <b>Time frame: Since the initial planning of the work</b> |                                                                                                                                                                                |                                                                                              |                                                                                                                                                                                                                                                        |
| 1                                                         | All support for the present manuscript (e.g., funding, provision of study materials, medical writing, article processing charges, etc.)<br><b>No time limit for this item.</b> | Hitachi Chemical Company of Tokyo, Japan                                                     | Hitachi Chemical Company of Tokyo Japan and The University of Texas MD Anderson Cancer Center entered into a Strategic Alliance Agreement to develop the MCA instrument and conduct the clinical trial that produced data reported in this manuscript. |
|                                                           |                                                                                                                                                                                |                                                                                              |                                                                                                                                                                                                                                                        |
|                                                           |                                                                                                                                                                                |                                                                                              |                                                                                                                                                                                                                                                        |
| <b>Time frame: past 36 months</b>                         |                                                                                                                                                                                |                                                                                              |                                                                                                                                                                                                                                                        |
| 2                                                         | Grants or contracts from any entity (if not indicated in item #1 above).                                                                                                       | None                                                                                         |                                                                                                                                                                                                                                                        |
|                                                           |                                                                                                                                                                                |                                                                                              |                                                                                                                                                                                                                                                        |
| 3                                                         | Royalties or licenses                                                                                                                                                          | None                                                                                         |                                                                                                                                                                                                                                                        |
|                                                           |                                                                                                                                                                                |                                                                                              |                                                                                                                                                                                                                                                        |
| 4                                                         | Consulting fees                                                                                                                                                                | None                                                                                         |                                                                                                                                                                                                                                                        |

|    |                                                                                                              |      |  |
|----|--------------------------------------------------------------------------------------------------------------|------|--|
|    |                                                                                                              |      |  |
| 5  | Payment or honoraria for lectures, presentations, speakers bureaus, manuscript writing or educational events | None |  |
| 6  | Payment for expert testimony                                                                                 | None |  |
| 7  | Support for attending meetings and/or travel                                                                 | None |  |
| 8  | Patents planned, issued or pending                                                                           | None |  |
| 9  | Participation on a Data Safety Monitoring Board or Advisory Board                                            | None |  |
| 10 | Leadership or fiduciary role in other board, society, committee or advocacy group, paid or unpaid            | None |  |
| 11 | Stock or stock options                                                                                       | None |  |
| 12 | Receipt of equipment, materials, drugs, medical writing, gifts or other services                             | None |  |
| 13 | Other financial or non-financial interests                                                                   | None |  |

**Please summarize the above conflict of interest in the following box:**

Hitachi Chemical Company of Tokyo Japan and The University of Texas MD Anderson Cancer Center entered into a Strategic Alliance Agreement to develop the MCA instrument and conduct the clinical trial that produced data reported in this manuscript.

**Please place an "X" next to the following statement to indicate your agreement:**

  x   I certify that I have answered every question and have not altered the wording of any of the questions on this form.



## ICMJE DISCLOSURE FORM

Date: 6/15/2022

Your Name: Suyu Liu

Manuscript Title: Gene expression profiling of circulating tumor cells captured by MicroCavity Array is superior to enumeration in demonstrating therapy response in patients with newly diagnosed advanced and locally advanced Non-Small Cell Lung Cancer

Manuscript number (if known): TLCR-22-314

In the interest of transparency, we ask you to disclose all relationships/activities/interests listed below that are related to the content of your manuscript. "Related" means any relation with for-profit or not-for-profit third parties whose interests may be affected by the content of the manuscript. Disclosure represents a commitment to transparency and does not necessarily indicate a bias. If you are in doubt about whether to list a relationship/activity/interest, it is preferable that you do so.

The following questions apply to the author's relationships/activities/interests as they relate to the current manuscript only.

The author's relationships/activities/interests should be defined broadly. For example, if your manuscript pertains to the epidemiology of hypertension, you should declare all relationships with manufacturers of antihypertensive medication, even if that medication is not mentioned in the manuscript.

In item #1 below, report all support for the work reported in this manuscript without time limit. For all other items, the time frame for disclosure is the past 36 months.

|                                                           |                                                                                                                                                                                | Name all entities with whom you have this relationship or indicate none (add rows as needed) | Specifications/Comments (e.g., if payments were made to you or to your institution)                                                                                                                                                                    |
|-----------------------------------------------------------|--------------------------------------------------------------------------------------------------------------------------------------------------------------------------------|----------------------------------------------------------------------------------------------|--------------------------------------------------------------------------------------------------------------------------------------------------------------------------------------------------------------------------------------------------------|
| <b>Time frame: Since the initial planning of the work</b> |                                                                                                                                                                                |                                                                                              |                                                                                                                                                                                                                                                        |
| 1                                                         | All support for the present manuscript (e.g., funding, provision of study materials, medical writing, article processing charges, etc.)<br><b>No time limit for this item.</b> | Hitachi Chemical Company of Tokyo, Japan                                                     | Hitachi Chemical Company of Tokyo Japan and The University of Texas MD Anderson Cancer Center entered into a Strategic Alliance Agreement to develop the MCA instrument and conduct the clinical trial that produced data reported in this manuscript. |
|                                                           |                                                                                                                                                                                |                                                                                              |                                                                                                                                                                                                                                                        |
|                                                           |                                                                                                                                                                                |                                                                                              |                                                                                                                                                                                                                                                        |
| <b>Time frame: past 36 months</b>                         |                                                                                                                                                                                |                                                                                              |                                                                                                                                                                                                                                                        |
| 2                                                         | Grants or contracts from any entity (if not indicated in item #1 above).                                                                                                       | None                                                                                         |                                                                                                                                                                                                                                                        |
|                                                           |                                                                                                                                                                                |                                                                                              |                                                                                                                                                                                                                                                        |
| 3                                                         | Royalties or licenses                                                                                                                                                          | None                                                                                         |                                                                                                                                                                                                                                                        |
|                                                           |                                                                                                                                                                                |                                                                                              |                                                                                                                                                                                                                                                        |
| 4                                                         | Consulting fees                                                                                                                                                                | None                                                                                         |                                                                                                                                                                                                                                                        |

|    |                                                                                                              |      |  |
|----|--------------------------------------------------------------------------------------------------------------|------|--|
|    |                                                                                                              |      |  |
| 5  | Payment or honoraria for lectures, presentations, speakers bureaus, manuscript writing or educational events | None |  |
| 6  | Payment for expert testimony                                                                                 | None |  |
| 7  | Support for attending meetings and/or travel                                                                 | None |  |
| 8  | Patents planned, issued or pending                                                                           | None |  |
| 9  | Participation on a Data Safety Monitoring Board or Advisory Board                                            | None |  |
| 10 | Leadership or fiduciary role in other board, society, committee or advocacy group, paid or unpaid            | None |  |
| 11 | Stock or stock options                                                                                       | None |  |
| 12 | Receipt of equipment, materials, drugs, medical writing, gifts or other services                             | None |  |
| 13 | Other financial or non-financial interests                                                                   | None |  |

**Please summarize the above conflict of interest in the following box:**

Hitachi Chemical Company of Tokyo Japan and The University of Texas MD Anderson Cancer Center entered into a Strategic Alliance Agreement to develop the MCA instrument and conduct the clinical trial that produced data reported in this manuscript.

**Please place an "X" next to the following statement to indicate your agreement:**

  x   I certify that I have answered every question and have not altered the wording of any of the questions on this form.

## ICMJE DISCLOSURE FORM

Date: 01/16/2023

Your Name: Luyang Yao

Manuscript Title: Gene expression profiling of circulating tumor cells captured by MicroCavity Array is superior to enumeration in demonstrating therapy response in patients with newly diagnosed advanced and locally advanced Non-Small Cell Lung Cancer

Manuscript number (if known): TLCR-22-314-CL

In the interest of transparency, we ask you to disclose all relationships/activities/interests listed below that are related to the content of your manuscript. "Related" means any relation with for-profit or not-for-profit third parties whose interests may be affected by the content of the manuscript. Disclosure represents a commitment to transparency and does not necessarily indicate a bias. If you are in doubt about whether to list a relationship/activity/interest, it is preferable that you do so.

The following questions apply to the author's relationships/activities/interests as they relate to the current manuscript only.

The author's relationships/activities/interests should be defined broadly. For example, if your manuscript pertains to the epidemiology of hypertension, you should declare all relationships with manufacturers of antihypertensive medication, even if that medication is not mentioned in the manuscript.

In item #1 below, report all support for the work reported in this manuscript without time limit. For all other items, the time frame for disclosure is the past 36 months.

|                                   |                                                                                                                                                                                | Name all entities with whom you have this relationship or indicate none (add rows as needed) | Specifications/Comments (e.g., if payments were made to you or to your institution)                                                                                                                                                                    |
|-----------------------------------|--------------------------------------------------------------------------------------------------------------------------------------------------------------------------------|----------------------------------------------------------------------------------------------|--------------------------------------------------------------------------------------------------------------------------------------------------------------------------------------------------------------------------------------------------------|
|                                   |                                                                                                                                                                                |                                                                                              |                                                                                                                                                                                                                                                        |
| 1                                 | All support for the present manuscript (e.g., funding, provision of study materials, medical writing, article processing charges, etc.)<br><b>No time limit for this item.</b> | Hitachi Chemical Company of Tokyo, Japan                                                     | Hitachi Chemical Company of Tokyo Japan and The University of Texas MD Anderson Cancer Center entered into a Strategic Alliance Agreement to develop the MCA instrument and conduct the clinical trial that produced data reported in this manuscript. |
|                                   |                                                                                                                                                                                |                                                                                              |                                                                                                                                                                                                                                                        |
|                                   |                                                                                                                                                                                |                                                                                              |                                                                                                                                                                                                                                                        |
|                                   |                                                                                                                                                                                |                                                                                              |                                                                                                                                                                                                                                                        |
|                                   |                                                                                                                                                                                |                                                                                              |                                                                                                                                                                                                                                                        |
|                                   |                                                                                                                                                                                |                                                                                              |                                                                                                                                                                                                                                                        |
|                                   |                                                                                                                                                                                |                                                                                              |                                                                                                                                                                                                                                                        |
| <b>Time frame: past 36 months</b> |                                                                                                                                                                                |                                                                                              |                                                                                                                                                                                                                                                        |
| 2                                 | Grants or contracts from any entity (if not indicated in item #1 above).                                                                                                       | None                                                                                         |                                                                                                                                                                                                                                                        |
|                                   |                                                                                                                                                                                |                                                                                              |                                                                                                                                                                                                                                                        |
| 3                                 | Royalties or licenses                                                                                                                                                          | None                                                                                         |                                                                                                                                                                                                                                                        |

|    |                                                                                                              |      |  |
|----|--------------------------------------------------------------------------------------------------------------|------|--|
|    |                                                                                                              |      |  |
| 4  | Consulting fees                                                                                              | None |  |
|    |                                                                                                              |      |  |
| 5  | Payment or honoraria for lectures, presentations, speakers bureaus, manuscript writing or educational events | None |  |
|    |                                                                                                              |      |  |
| 6  | Payment for expert testimony                                                                                 | None |  |
|    |                                                                                                              |      |  |
| 7  | Support for attending meetings and/or travel                                                                 | None |  |
|    |                                                                                                              |      |  |
| 8  | Patents planned, issued or pending                                                                           | None |  |
|    |                                                                                                              |      |  |
| 9  | Participation on a Data Safety Monitoring Board or Advisory Board                                            | None |  |
|    |                                                                                                              |      |  |
| 10 | Leadership or fiduciary role in other board, society, committee or advocacy group, paid or unpaid            | None |  |
|    |                                                                                                              |      |  |
| 11 | Stock or stock options                                                                                       | None |  |
|    |                                                                                                              |      |  |
| 12 | Receipt of equipment, materials, drugs, medical writing, gifts or other services                             | None |  |
|    |                                                                                                              |      |  |
| 13 | Other financial or non-financial interests                                                                   | None |  |
|    |                                                                                                              |      |  |

**Please summarize the above conflict of interest in the following box:**

Hitachi Chemical Company of Tokyo Japan and The University of Texas MD Anderson Cancer Center entered into a Strategic Alliance Agreement to develop the MCA instrument and conduct the clinical trial that produced data reported in this manuscript.

**Please place an "X" next to the following statement to indicate your agreement:**

  x   I certify that I have answered every question and have not altered the wording of any of the questions on this form.

## ICMJE DISCLOSURE FORM

Date: 6/15/2022

Your Name: Steven Hsheng Lin

Manuscript Title: Gene expression profiling of circulating tumor cells captured by MicroCavity Array is superior to enumeration in demonstrating therapy response in patients with newly diagnosed advanced and locally advanced Non-Small Cell Lung Cancer

Manuscript number (if known): TLCR-22-314

In the interest of transparency, we ask you to disclose all relationships/activities/interests listed below that are related to the content of your manuscript. "Related" means any relation with for-profit or not-for-profit third parties whose interests may be affected by the content of the manuscript. Disclosure represents a commitment to transparency and does not necessarily indicate a bias. If you are in doubt about whether to list a relationship/activity/interest, it is preferable that you do so.

The following questions apply to the author's relationships/activities/interests as they relate to the current manuscript only.

The author's relationships/activities/interests should be defined broadly. For example, if your manuscript pertains to the epidemiology of hypertension, you should declare all relationships with manufacturers of antihypertensive medication, even if that medication is not mentioned in the manuscript.

In item #1 below, report all support for the work reported in this manuscript without time limit. For all other items, the time frame for disclosure is the past 36 months.

|                                                           |                                                                                                                                                                                | Name all entities with whom you have this relationship or indicate none (add rows as needed) | Specifications/Comments (e.g., if payments were made to you or to your institution)                                                                                                                                                                    |
|-----------------------------------------------------------|--------------------------------------------------------------------------------------------------------------------------------------------------------------------------------|----------------------------------------------------------------------------------------------|--------------------------------------------------------------------------------------------------------------------------------------------------------------------------------------------------------------------------------------------------------|
| <b>Time frame: Since the initial planning of the work</b> |                                                                                                                                                                                |                                                                                              |                                                                                                                                                                                                                                                        |
| 1                                                         | All support for the present manuscript (e.g., funding, provision of study materials, medical writing, article processing charges, etc.)<br><b>No time limit for this item.</b> | Hitachi Chemical Company of Tokyo, Japan                                                     | Hitachi Chemical Company of Tokyo Japan and The University of Texas MD Anderson Cancer Center entered into a Strategic Alliance Agreement to develop the MCA instrument and conduct the clinical trial that produced data reported in this manuscript. |
| <b>Time frame: past 36 months</b>                         |                                                                                                                                                                                |                                                                                              |                                                                                                                                                                                                                                                        |
| 2                                                         | Grants or contracts from any entity (if not indicated in item #1 above).                                                                                                       | STCube Pharmaceuticals                                                                       |                                                                                                                                                                                                                                                        |
|                                                           |                                                                                                                                                                                | Beyond Spring Pharmaceuticals                                                                |                                                                                                                                                                                                                                                        |
|                                                           |                                                                                                                                                                                | Nektar Therapeutics                                                                          |                                                                                                                                                                                                                                                        |
| 3                                                         | Royalties or licenses                                                                                                                                                          | None                                                                                         |                                                                                                                                                                                                                                                        |
| 4                                                         | Consulting fees                                                                                                                                                                | XRAD Therapeutics                                                                            | Consultant                                                                                                                                                                                                                                             |

|    |                                                                                                              |                                     |                                  |
|----|--------------------------------------------------------------------------------------------------------------|-------------------------------------|----------------------------------|
|    |                                                                                                              |                                     |                                  |
| 5  | Payment or honoraria for lectures, presentations, speakers bureaus, manuscript writing or educational events | None                                |                                  |
| 6  | Payment for expert testimony                                                                                 | None                                |                                  |
| 7  | Support for attending meetings and/or travel                                                                 | None                                |                                  |
| 8  | Patents planned, issued or pending                                                                           | None                                |                                  |
| 9  | Participation on a Data Safety Monitoring Board or Advisory Board                                            | None                                |                                  |
| 10 | Leadership or fiduciary role in other board, society, committee or advocacy group, paid or unpaid            | Creatv Microtech<br>AstraZeneca Inc | Advisory Board<br>Advisory Board |
| 11 | Stock or stock options                                                                                       | Scenexo, Inc                        | Co-Founder, Stockholder          |
| 12 | Receipt of equipment, materials, drugs, medical writing, gifts or other services                             | None                                |                                  |
| 13 | Other financial or non-financial interests                                                                   | None                                |                                  |

**Please summarize the above conflict of interest in the following box:**

Hitachi Chemical Company of Tokyo Japan and The University of Texas MD Anderson Cancer Center entered into a Strategic Alliance Agreement to develop the MCA instrument and conduct the clinical trial that produced data reported in this manuscript. Dr. Lin reports grants from STCube Pharmaceuticals, grants from Beyond Spring Pharmaceuticals, grants from Nektar Therapeutics, other from Creatv Microtech, other from AstraZeneca Inc, other from XRAD Therapeutics, non-financial support and other from Scenexo, Inc, outside the submitted work.

**Please place an "X" next to the following statement to indicate your agreement:**

  x   I certify that I have answered every question and have not altered the wording of any of the questions on this form.

## ICMJE DISCLOSURE FORM

Date: 6/15/2022

Your Name: James M Reuben

Manuscript Title: Gene expression profiling of circulating tumor cells captured by MicroCavity Array is superior to enumeration in demonstrating therapy response in patients with newly diagnosed advanced and locally advanced Non-Small Cell Lung Cancer

Manuscript number (if known): TLCR-22-314

In the interest of transparency, we ask you to disclose all relationships/activities/interests listed below that are related to the content of your manuscript. "Related" means any relation with for-profit or not-for-profit third parties whose interests may be affected by the content of the manuscript. Disclosure represents a commitment to transparency and does not necessarily indicate a bias. If you are in doubt about whether to list a relationship/activity/interest, it is preferable that you do so.

The following questions apply to the author's relationships/activities/interests as they relate to the current manuscript only.

The author's relationships/activities/interests should be defined broadly. For example, if your manuscript pertains to the epidemiology of hypertension, you should declare all relationships with manufacturers of antihypertensive medication, even if that medication is not mentioned in the manuscript.

In item #1 below, report all support for the work reported in this manuscript without time limit. For all other items, the time frame for disclosure is the past 36 months.

|                                                           |                                                                                                                                                                                | Name all entities with whom you have this relationship or indicate none (add rows as needed) | Specifications/Comments (e.g., if payments were made to you or to your institution)                                                                                                                                                                    |
|-----------------------------------------------------------|--------------------------------------------------------------------------------------------------------------------------------------------------------------------------------|----------------------------------------------------------------------------------------------|--------------------------------------------------------------------------------------------------------------------------------------------------------------------------------------------------------------------------------------------------------|
| <b>Time frame: Since the initial planning of the work</b> |                                                                                                                                                                                |                                                                                              |                                                                                                                                                                                                                                                        |
| 1                                                         | All support for the present manuscript (e.g., funding, provision of study materials, medical writing, article processing charges, etc.)<br><b>No time limit for this item.</b> | Hitachi Chemical Company of Tokyo, Japan                                                     | Hitachi Chemical Company of Tokyo Japan and The University of Texas MD Anderson Cancer Center entered into a Strategic Alliance Agreement to develop the MCA instrument and conduct the clinical trial that produced data reported in this manuscript. |
|                                                           |                                                                                                                                                                                |                                                                                              |                                                                                                                                                                                                                                                        |
|                                                           |                                                                                                                                                                                |                                                                                              |                                                                                                                                                                                                                                                        |
| <b>Time frame: past 36 months</b>                         |                                                                                                                                                                                |                                                                                              |                                                                                                                                                                                                                                                        |
| 2                                                         | Grants or contracts from any entity (if not indicated in item #1 above).                                                                                                       | Angle plc, UK                                                                                | Angle plc provides funds for circulating tumor cell research.                                                                                                                                                                                          |
|                                                           |                                                                                                                                                                                |                                                                                              |                                                                                                                                                                                                                                                        |
| 3                                                         | Royalties or licenses                                                                                                                                                          | None                                                                                         |                                                                                                                                                                                                                                                        |
|                                                           |                                                                                                                                                                                |                                                                                              |                                                                                                                                                                                                                                                        |
|                                                           |                                                                                                                                                                                |                                                                                              |                                                                                                                                                                                                                                                        |

|    |                                                                                                              |                                        |                                                                                                          |
|----|--------------------------------------------------------------------------------------------------------------|----------------------------------------|----------------------------------------------------------------------------------------------------------|
| 4  | Consulting fees                                                                                              | Angle plc, UK                          | Member of the Scientific Advisory Board of Angle plc                                                     |
|    |                                                                                                              |                                        |                                                                                                          |
|    |                                                                                                              |                                        |                                                                                                          |
| 5  | Payment or honoraria for lectures, presentations, speakers bureaus, manuscript writing or educational events | None                                   |                                                                                                          |
|    |                                                                                                              |                                        |                                                                                                          |
|    |                                                                                                              |                                        |                                                                                                          |
| 6  | Payment for expert testimony                                                                                 | None                                   |                                                                                                          |
|    |                                                                                                              |                                        |                                                                                                          |
|    |                                                                                                              |                                        |                                                                                                          |
| 7  | Support for attending meetings and/or travel                                                                 | None                                   |                                                                                                          |
|    |                                                                                                              |                                        |                                                                                                          |
|    |                                                                                                              |                                        |                                                                                                          |
| 8  | Patents planned, issued or pending                                                                           | None                                   |                                                                                                          |
|    |                                                                                                              |                                        |                                                                                                          |
|    |                                                                                                              |                                        |                                                                                                          |
| 9  | Participation on a Data Safety Monitoring Board or Advisory Board                                            | Angle plc                              | Member of Scientific Advisory Board                                                                      |
|    |                                                                                                              |                                        |                                                                                                          |
|    |                                                                                                              |                                        |                                                                                                          |
| 10 | Leadership or fiduciary role in other board, society, committee or advocacy group, paid or unpaid            | None                                   |                                                                                                          |
|    |                                                                                                              |                                        |                                                                                                          |
|    |                                                                                                              |                                        |                                                                                                          |
| 11 | Stock or stock options                                                                                       | None                                   |                                                                                                          |
|    |                                                                                                              |                                        |                                                                                                          |
|    |                                                                                                              |                                        |                                                                                                          |
| 12 | Receipt of equipment, materials, drugs, medical writing, gifts or other services                             | Hitachi Chemical Company, Tokyo, Japan | Provided financial and instrumentation support to conduct the clinical trial reported in this manuscript |
|    |                                                                                                              |                                        |                                                                                                          |
|    |                                                                                                              |                                        |                                                                                                          |
| 13 | Other financial or non-financial interests                                                                   | None                                   |                                                                                                          |
|    |                                                                                                              |                                        |                                                                                                          |
|    |                                                                                                              |                                        |                                                                                                          |

**Please summarize the above conflict of interest in the following box:**

Hitachi Chemical Company of Tokyo Japan and The University of Texas MD Anderson Cancer Center entered into a Strategic Alliance Agreement to develop the MCA instrument and conduct the clinical trial that produced data reported in this manuscript. JMR serves as a member of the Scientific Advisory Board for Angle plc.

**Please place an "X" next to the following statement to indicate your agreement:**

  x   I certify that I have answered every question and have not altered the wording of any of the questions on this form.
